# Supplementary material
Source: publisher figshare collection journal article supplement (https://acs.figshare.com/ndownloader/files/4585324)
Supplement: Supplementary file 1 [file 4585324]

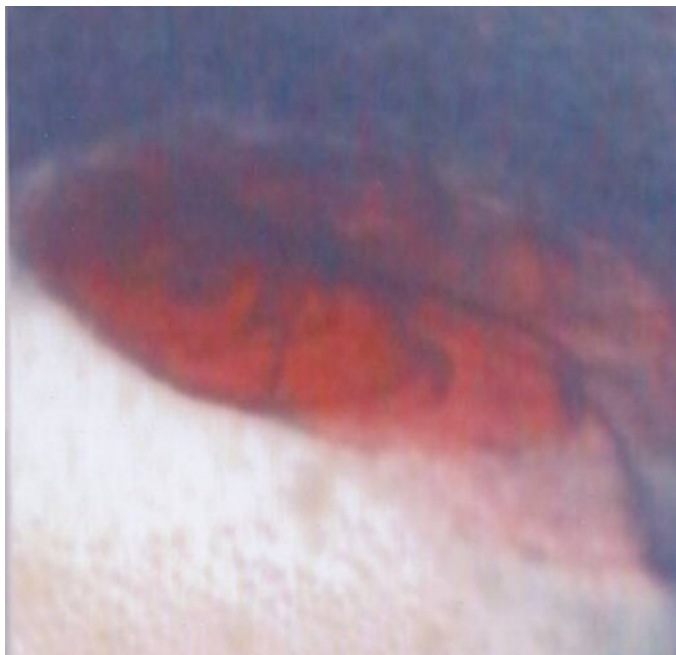

**Figure 1**

Pink-colored crystals of the IF-Cbl complex; the largest has dimensions of approximately  $0.4 \times 0.15 \times 0.08 \text{ mm}^3$ .
